# Supplementary material for: Synthesis of the silver(i) complex of CH2[CH(pz4Et)2]2containing the unprecedented [Ag(NO3)4]3−anion: A general method for the preparation of 4-(alkyl)pyrazoles
Source: Royal Society of Chemistry journal article supplement (doi:10.1039/b307306h), 2003-01-01

**Figure S5.** Crystal packing diagram of the unit cell of  $[\text{Ag}_2\{\mu\text{-CH}_2[\text{CH}(\text{pz}^{4\text{Et}})_2\}_2\}_3[\text{Ag}(\text{NO}_3)_4]_2 \cdot (\text{acetone}_x/\text{Et}_2\text{O}_y)$  components with residual solvent molecules of unidentified stoichiometry removed to emphasize the pore size.

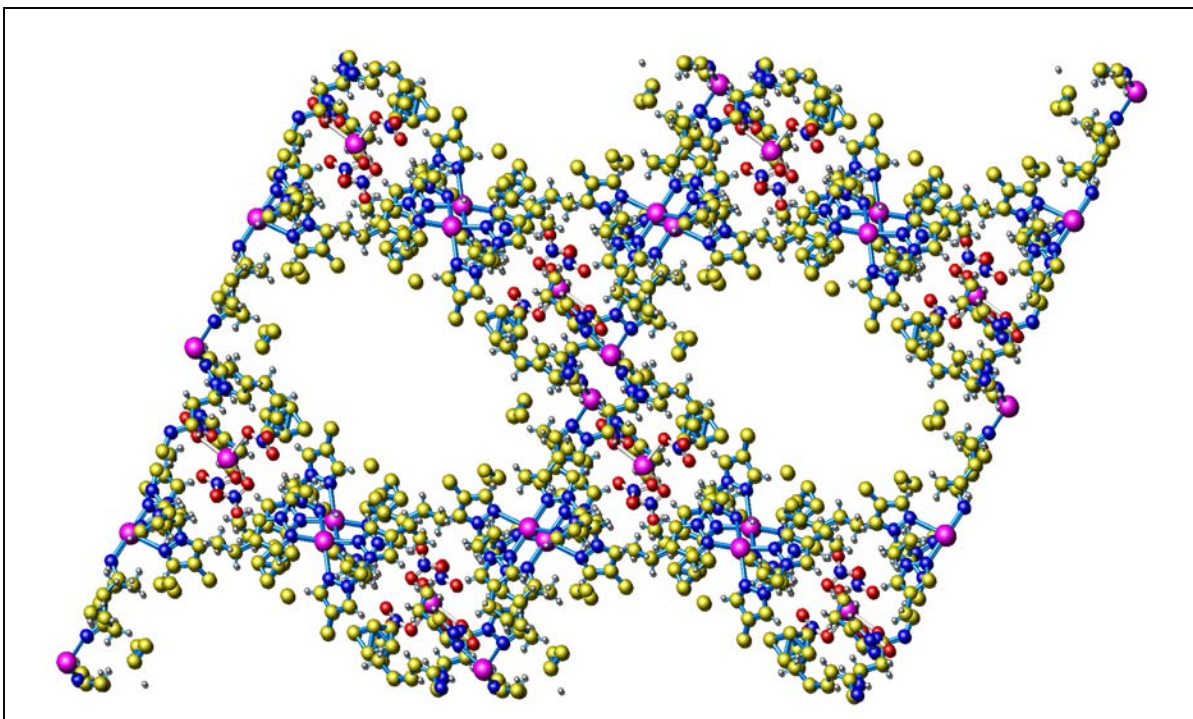

Supplement: b307306h.pdf [file b307306h.pdf]
